# Supplementary material for: Fluorescent organogels as templates for sol–gel transcription toward creation of optical nanofibers
Source: Royal Society of Chemistry journal article supplement (doi:10.1039/b501067e), 2005-01-01
Supplement: b501067e.pdf [file b501067e.pdf]

## *Electronic Supplementary Information*

### **Fluorescent organogels as templates for sol-gel transcription toward creation of optical nano-fibers**

**Kazunori Sugiyasu, Norifumi Fujita and Seiji Shinkai\***

*Department of Chemistry and Biochemistry, Graduate School of Engineering, Kyushu University, 6-10-1, Hakozaki, Higashi-ku, Fukuoka, 812-8581 Japan, Fax: +81-92-642-3611, E-mail: seijitcm@mbox.nc.kyushu-u.ac.jp*

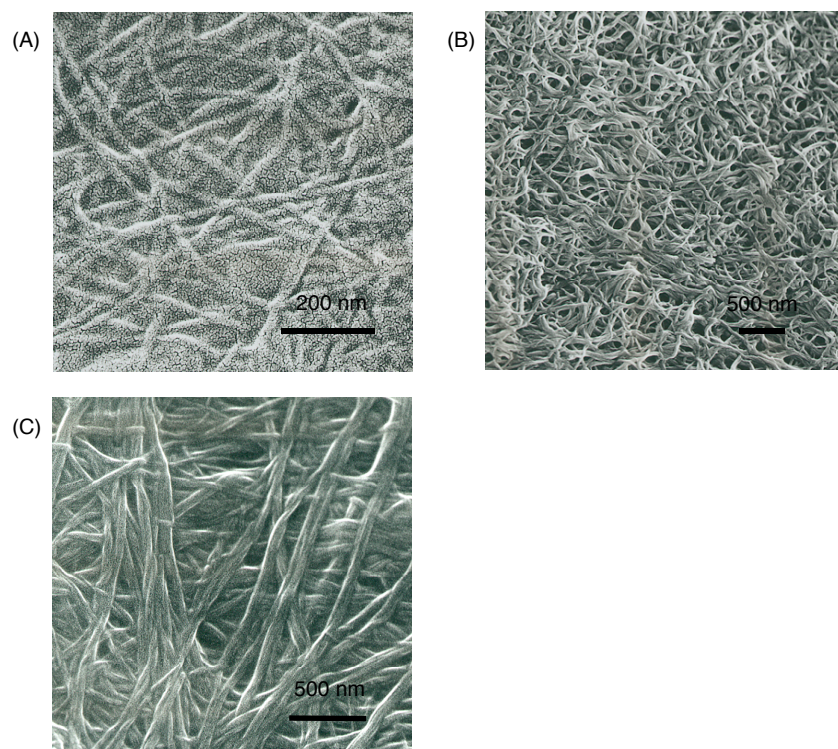

**Fig. S1** SEM images of the organic-inorganic hybrid (before calcination) prepared from **1**+TFA/DMF gel, (B) **2** + TFA/cyclohexane gel and (C) **2** + TFA/acetone gel.

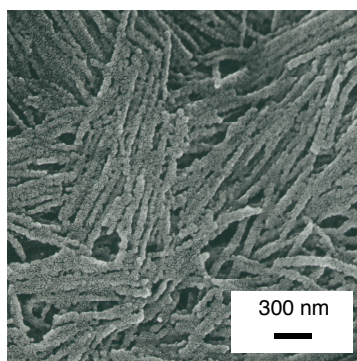

**Fig. S2** SEM image of the titania material obtained from **2** acetic acid gel.
